# Supplementary material for: Atypical juvenile presentation of GM2 gangliosidosis AB in a patient compound-heterozygote for c.259G > T and c.164C > T mutations in the GM2A gene
Source: PubMed Central journal article supplement — Mol Genet Metab Rep. 2017 Apr 7;11:24–9. doi: 10.1016/j.ymgmr.2017.01.017 (PMC5388932; doi:10.1016/j.ymgmr.2017.01.017), 2017-04-07
Supplement: mmc1.pdf [file mmc1.pdf]

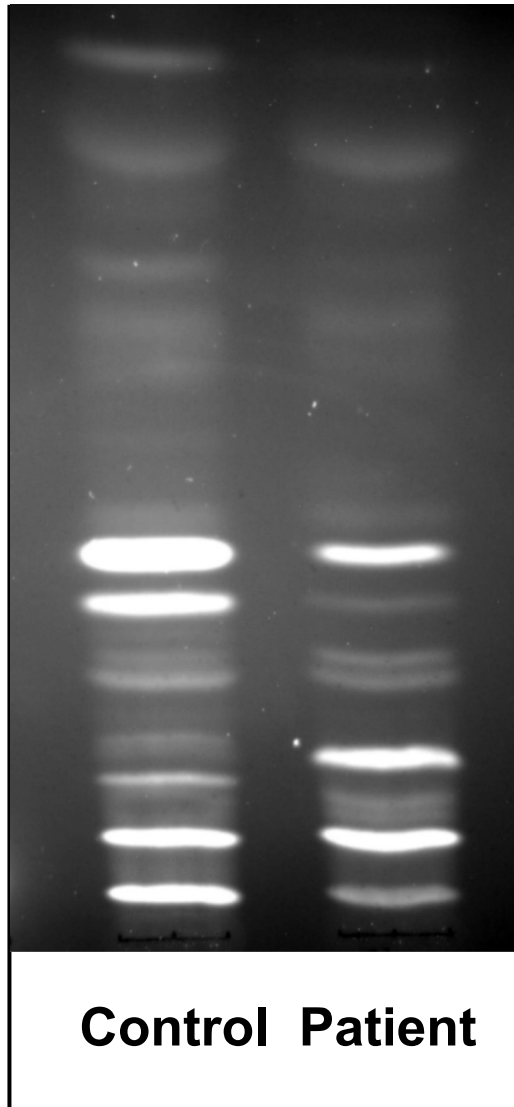

**Supplementary Figure 1. Fluorescently labeled neutral glycosphingolipids are decreased in patient's fibroblasts.**

Fibroblasts of the patient or normal healthy control subject were cultured in the presence of 1.45  $\mu\text{M}$  fluorescently labelled BODIPY® FL C5 G<sub>M1</sub> ganglioside for 72 h. Total lipids were extracted from cell pellets with 1:1 chloroform/methanol mixture and the neutral lipids were separated from gangliosides and analysed by TLC on silica plates. The fluorescence image of the TLC plate was acquired on G:Box Chemi XQR system.
